# Supplementary material for: Cloning and Functional Verification of Endogenous U6 Promoters for the Establishment of Efficient CRISPR/Cas9-Based Genome Editing in Castor (Ricinus communis)
Source: MDPI journal article supplement (doi:10.3390/genes14071327), 2023-06-23
Supplement: s1 [file s1]

Table S1. Primer sequences used in this study.

| Primer name         | 5'-sequence-3'                                  |
|---------------------|-------------------------------------------------|
| B4-RcU6-1pro_F      | ATAGAAAAGTTGTTTATTGCTCCAGTCCAAGGTCAC            |
| B4-RcU6-1pro(533)_F | ATAGAAAAGTTGTTTAGTTGGCAGCCTTCAGATTTTC           |
| B4-RcU6-1pro(307)_F | ATAGAAAAGTTGTTTTGCAATTATCCAGTCCTGCT             |
| B1R-RcU6-1pro_R     | TTTGTACAAACTTGCGCATGGTGCTTGCTTGTAGG             |
| B4-RcU6-2pro_F      | ATAGAAAAGTTGTTTGCCAATAATCACATCAAACAGG           |
| B4-RcU6-2pro(504)_F | ATAGAAAAGTTGTTTGACAAGGCAATAGATTCAAC             |
| B4-RcU6-2pro(289)_F | ATAGAAAAGTTGTTAAATGCAGTCAGTGAAGTTGC             |
| B1R-RcU6-2pro_R     | TTTGTACAAACTTGCACTTCAGAAGCTAGCTTGATTTTC         |
| B4-RcU6-3pro_F      | ATAGAAAAGTTGTTGTTTGGTGGGAGAATCAAGGAG            |
| B4-RcU6-3pro(590)_F | ATAGAAAAGTTGTTTGGTTCAATAGCAGCTTTGGTG            |
| B4-RcU6-3pro(315)_F | ATAGAAAAGTTGTTTCAGGCAGCCATGTGAAAGTT             |
| B1R-RcU6-3pro_R     | TTTGTACAAACTTGCCAACGGTGTCTGTTTGCCCTAATTC        |
| B4-RcU6-4pro_F      | ATAGAAAAGTTGTTTCCGACATAATGCTCCAGAGTC            |
| B4-RcU6-4pro(596)_F | ATAGAAAAGTTGTTGAACCGGAAATGAGTTGACAAG            |
| B4-RcU6-4pro(332)_F | ATAGAAAAGTTGTTATAATTAAATGGTTATTCGTTATTGTG       |
| B1R-RcU6-4pro_R     | TTTGTACAAACTTGCGCATCATGCTGCCTCCCGTTTG           |
| B4-RcU6-5pro_F      | ATAGAAAAGTTGTTTTTCTTCTTGGTAGGGTTTGC             |
| B4-RcU6-5pro(550)_F | ATAGAAAAGTTGTTAATTACACATAAAATTGAATTACACATGTC    |
| B4-RcU6-5pro(260)_F | ATAGAAAAGTTGTTTTTCTGGGAGGTATGCATCAA             |
| B1R-RcU6-5pro_R     | TTTGTACAAACTTGCGTAGCATGTCGTTTTTGTACTTATAAAC     |
| B4-RcU6-6pro_F      | ATAGAAAAGTTGTTATTTTCAGTTGCCGAAACTCTCC           |
| B4-RcU6-6pro(611)_F | ATAGAAAAGTTGTTATGTTACACATGACAAGCAATACTAA        |
| B4-RcU6-6pro(289)_F | ATAGAAAAGTTGTTCAATGTTTTCTTTTATGGAATTCTCG        |
| B1R-RcU6-6pro_R     | TTTGTACAAACTTGCCCAACCAGCTGTTTGCCCTAATTC         |
| B1-Venus_F          | AAAAAGCAGGCTTTATGGTGAGCAAGGGCGAGG               |
| B2-VenusPTS1_R      | AGAAAGCTGGGTT TCATAGCTTCGAAACCTTGTACAGCTCGTCCAT |

---

## Experiment

---

cloning for RcU6-1pro  
cloning for RcU6-1pro(533)  
cloning for RcU6-1pro(307)  
cloning for RcU6-1pro, RcU6-1pro(533) and RcU6-1pro(307)

cloning for RcU6-2pro  
cloning for RcU6-2pro(504)  
cloning for RcU6-2pro(289)  
cloning for RcU6-2pro, RcU6-2pro(504) and RcU6-2pro(289)

cloning for RcU6-3pro  
cloning for RcU6-3pro(590)  
cloning for RcU6-3pro(315)  
cloning for RcU6-3pro, RcU6-3pro(590) and RcU6-3pro(315)

cloning for RcU6-4pro  
cloning for RcU6-4pro(596)  
cloning for RcU6-4pro(332)  
cloning for RcU6-4pro, RcU6-4pro(596) and RcU6-4pro(332)

cloning for RcU6-5pro  
cloning for RcU6-5pro(550)  
cloning for RcU6-5pro(260)  
cloning for RcU6-5pro, RcU6-5pro(550) and RcU6-5pro(260)

cloning for RcU6-6pro  
cloning for RcU6-6pro(611)  
cloning for RcU6-6pro(289)  
cloning for RcU6-6pro, RcU6-6pro(611) and RcU6-6pro(289)

cloning for Venus-PTS1

---
